# Supplementary material for: 3-Bromo-Isoxazoline Derivatives Inhibit GAPDH Enzyme in PDAC Cells Triggering Autophagy and Apoptotic Cell Death
Source: MDPI journal article supplement (doi:10.3390/cancers14133153), 2022-06-27
Supplement: s1 [file s1]

## Supplementary figures

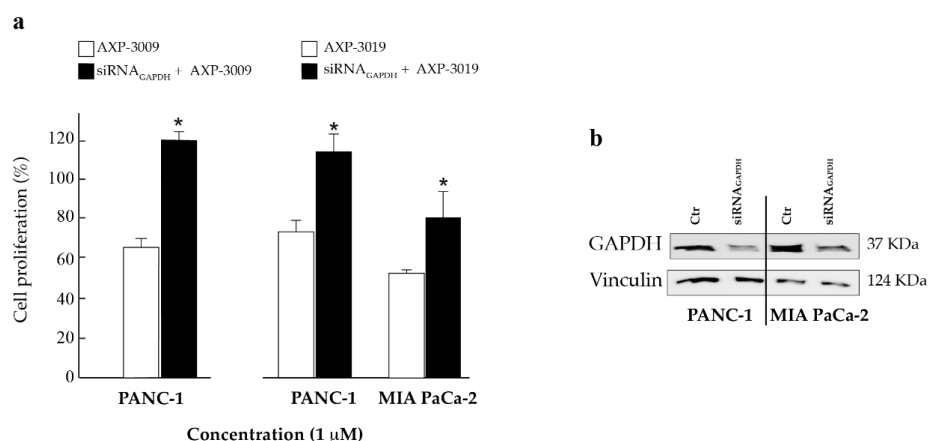

**Figure S1.** Effect of 3-bromo-isoxazoline derivatives in GAPDH knocking-down condition on PDAC cell proliferation. PANC-1 and MIA PaCa-2 cell lines were treated with AXP-3009 or AXP-3019 inhibitors at 1  $\mu$ M for 48 h in the absence or in the presence of GAPDH silencing (siRNA<sub>GAPDH</sub>). The percentage of cell growth was calculated using crystal violet assay (S1a). The accompanying Western immunoblot of GAPDH and vinculin (loading control) are reported in (S1b). Statistical analysis \*  $p < 0.05$ .

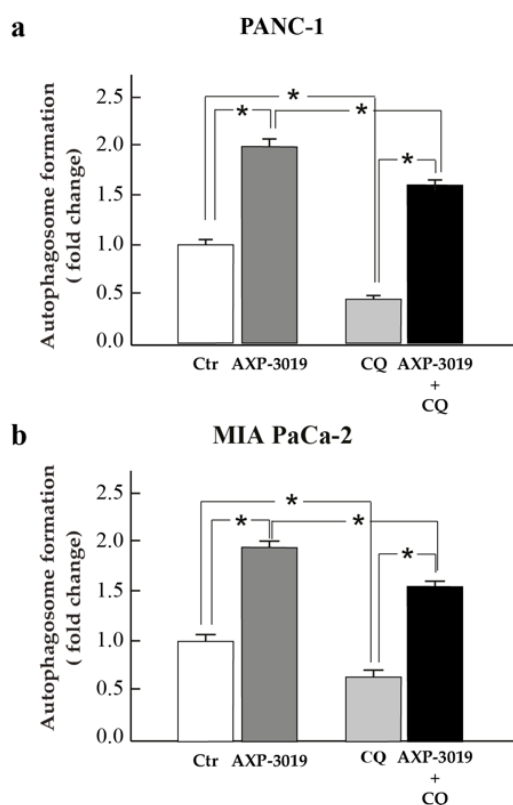

**Figure S2.** CQ reduces basal and AXP-3019-stimulated autophagy in PDAC cell lines. PDAC cell lines, PANC-1 (S2a), and MIA PaCa-2 (S2b) were treated with AXP-3019 alone or in combination with the autophagy inhibitor, CQ. Cells were treated with the fluorescent probe monodansyl-cadaverine (MDC) to quantify autophagic-vesicles formation. The values were normalized on cell proliferation by crystal violet assay. Statistical analysis \*  $p < 0.05$ .
